# Supplementary material for: Immune evasion by Cryptococcus gattii in vaccinated mice coinfected with C. neoformans
Source: PubMed Central journal article supplement (PMC10925662; doi:10.3389/fimmu.2024.1356651), 2024-02-26
Supplement: DataSheet_1.pdf [file DataSheet_1.pdf]

## *Supplementary Material*

**Table S1: Values derived from statistical analysis of cell and capsule measurements.**

| Areas ( $\mu\text{m}^2$ ) | <b>R265</b>    |       |         |                 |       |         |                 |      |         |             |
|---------------------------|----------------|-------|---------|-----------------|-------|---------|-----------------|------|---------|-------------|
|                           | 7 DPI<br>n=127 |       |         | 14 DPI<br>n=170 |       |         | 21 DPI<br>n=250 |      |         | YPD<br>n=62 |
|                           | Total          | Cell  | Capsule | Total           | Cell  | Capsule | Total           | Cell | Capsule | Cell        |
| <b>Minimum</b>            | 79             | 20    | 59      | 73              | 19    | 47      | 73              | 23   | 50      | 11          |
| <b>Maximum</b>            | 853            | 218   | 635     | 1,446           | 452   | 1,208   | 2,925           | 509  | 2,416   | 35          |
| <b>Median</b>             | 254            | 64    | 188     | 396             | 51    | 339     | 603             | 66   | 538     | 23          |
| <b>Mean</b>               | 272            | 66    | 206     | 437             | 67    | 370     | 748             | 77   | 671     | 23          |
| <b>Std. Deviation</b>     | 115            | 33    | 91      | 271             | 58    | 247     | 488             | 46   | 456     | 5           |
| <b>Std. Error of Mean</b> | 10             | 3     | 8       | 21              | 4     | 19      | 31              | 3    | 29      | 1           |
| Areas ( $\mu\text{m}^2$ ) | <b>KN99</b>    |       |         |                 |       |         |                 |      |         |             |
|                           | 7 DPI<br>n=349 |       |         | 14 DPI<br>n=191 |       |         | 21 DPI<br>n=270 |      |         | YPD<br>n=41 |
|                           | Total          | Cell  | Capsule | Total           | Cell  | Capsule | Total           | Cell | Capsule | Cell        |
| <b>Minimum</b>            | 41             | 7     | 32      | 29              | 5     | 23      | 38              | 7    | 31      | 9           |
| <b>Maximum</b>            | 2,968          | 1,448 | 1,652   | 2,781           | 1,425 | 2,461   | 2,088           | 885  | 1,656   | 35          |
| <b>Median</b>             | 572            | 97    | 462     | 230             | 38    | 180     | 247             | 37   | 213     | 20          |
| <b>Mean</b>               | 690            | 154   | 536     | 445             | 99    | 346     | 396             | 59   | 337     | 20          |
| <b>Std. Deviation</b>     | 447            | 162   | 326     | 514             | 182   | 374     | 370             | 69   | 317     | 5           |
| <b>Std. Error of Mean</b> | 24             | 9     | 17      | 37              | 13    | 27      | 23              | 4    | 19      | 1           |

**Table S2: Statistical significance of changes in cell, capsule, and total area measurements over time for cryptococcal cells from lungs of infected mice.**

| <b>Strain</b> | <b>Group 1 Area</b> | <b>Group 2 Area</b> | <b>P value</b> | <b>Significance</b> |
|---------------|---------------------|---------------------|----------------|---------------------|
| <b>R265</b>   | 7 DPI total         | 14 DPI total        | 0.0002         | ***                 |
|               | 14 DPI total        | 21 DPI total        | <0.0001        | ***                 |
|               | 7 DPI cell          | 14 DPI cell         | >0.9999        | ns                  |
|               | 14 DPI cell         | 21 DPI cell         | >0.9999        | ns                  |
|               | 7 DPI capsule       | 14 DPI capsule      | 0.0002         | ***                 |
|               | 14 DPI capsule      | 21 DPI capsule      | <0.0001        | ***                 |
| <b>KN99</b>   | 7 DPI total         | 14 DPI total        | <0.0001        | ***                 |
|               | 14 DPI total        | 21 DPI total        | 0.8935         | ns                  |
|               | 7 DPI cell area     | 14 DPI cell         | 0.6922         | ns                  |
|               | 14 DPI cell         | 21 DPI cell         | 0.9820         | ns                  |
|               | 7 DPI capsule       | 14 DPI capsule      | <0.0001        | ***                 |
|               | 14 DPI capsule      | 21 DPI capsule      | >0.9999        | ns                  |

Significance was determined by one-way ANOVA with Sidak's multiple comparisons test. ns, not significant at  $P > 0.05$ ; \*\*\* significant at  $P \leq 0.001$ .

**Table S3: Mean ± SEM of cytokines (pg/lung).**

|          | Unvaccinated |              |              |              |              |               |               |               | Vaccinated   |                |                |                |                |                |               |
|----------|--------------|--------------|--------------|--------------|--------------|---------------|---------------|---------------|--------------|----------------|----------------|----------------|----------------|----------------|---------------|
|          | none         | R265         |              |              | KN99         |               |               | none          | R265         |                |                | KN99           |                |                |               |
| Cytokine | 0 DPI        | 1 DPI        | 3 DPI        | 7 DPI        | 1 DPI        | 3 DPI         | 7 DPI         | 0 DPI         | 1 DPI        | 3 DPI          | 7 DPI          | 1 DPI          | 3 DPI          | 7 DPI          |               |
| Lungs    | IL-1β        | 100 ± 7      | 122 ± 3      | 115 ± 13     | 135 ± 15     | 121 ± 9       | 115 ± 18      | 486 ± 41      | 108 ± 4      | 156 ± 17       | 399 ± 174      | 440 ± 53       | 888 ± 41       | 2591 ± 510     | 2484 ± 751    |
|          | IL-2         | 132 ± 14     | 173 ± 4      | 162 ± 16     | 189 ± 15     | 136 ± 3       | 247 ± 55      | 266 ± 16      | 137 ± 8      | 158 ± 1        | 410 ± 185      | 196 ± 44       | 940 ± 75       | 336 ± 57       | 255 ± 8       |
|          | IL-4         | 63 ± 3       | 74 ± 2       | 68 ± 3       | 155 ± 9      | 82 ± 6        | 68 ± 4        | 2364 ± 745    | 80 ± 6       | 142 ± 20       | 476 ± 199      | 776 ± 170      | 7154 ± 2558    | 4901 ± 12      | 1887 ± 203    |
|          | IL-5         | 98 ± 156     | 149 ± 1      | 131 ± 17     | 340 ± 51     | 172 ± 26      | 151 ± 35      | 1247 ± 647    | 119 ± 8      | 155 ± 15       | 236 ± 63       | 436 ± 150      | 951 ± 142      | 1281 ± 295     | 699 ± 31      |
|          | IL-6         | 882 ± 107    | 1133 ± 71    | 1143 ± 101   | 4015 ± 919   | 1024 ± 171    | 1289 ± 259    | 7574 ± 2134   | 978 ± 96     | 1676 ± 174     | 2696 ± 1351    | 1538 ± 381     | 29973 ± 4800   | 15696 ± 6028   | 26037 ± 23298 |
|          | IL-9         | 2716 ± 247   | 3690 ± 13    | 3458 ± 500   | 4133 ± 538   | 3305 ± 283    | 3271 ± 705    | 6302 ± 161    | 3056 ± 119   | 2704 ± 39      | 5042 ± 1625    | 4163 ± 1281    | 4010 ± 335     | 7692 ± 1150    | 5862 ± 231    |
|          | IL-10        | 595 ± 64     | 994 ± 32     | 815 ± 111    | 790 ± 12     | 838 ± 38      | 830 ± 150     | 1031 ± 1034   | 723 ± 82     | 671 ± 72       | 882 ± 82       | 1281 ± 37      | 720 ± 123      | 1409 ± 209     | 1351 ± 113.5  |
|          | IL-12p70     | 169 ± 29     | 309 ± 12     | 224 ± 20     | 323 ± 51     | 254 ± 21      | 224 ± 42      | 699 ± 167     | 261 ± 93     | 214 ± 76       | 397 ± 216      | 193 ± 72       | 746 ± 58       | 620 ± 173      | 924 ± 178     |
|          | IL-13        | 161 ± 30     | 265 ± 12     | 234 ± 45     | 332 ± 54     | 259 ± 22      | 223 ± 69      | 1513 ± 660    | 202 ± 13     | 209 ± 15       | 381 ± 119      | 550 ± 219      | 835 ± 121      | 1316 ± 233     | 779 ± 97      |
|          | IL-17a       | 166 ± 41     | 310 ± 30     | 342 ± 72     | 487 ± 40     | 340 ± 82      | 285 ± 98      | 1895 ± 308    | 447 ± 43     | 656 ± 40       | 2805 ± 1124    | 3332 ± 1270    | 2386 ± 347     | 10057 ± 596    | 16717 ± 6731  |
|          | IL-18        | 6034 ± 86    | 6506 ± 44    | 6558 ± 75    | 8294 ± 256   | 11700 ± 4721  | 6216 ± 442    | 21420 ± 2552  | 6299 ± 60    | 6951 ± 239     | 9632 ± 1727    | 10879 ± 1314   | 43901 ± 9557   | 36617 ± 6681   | 29929 ± 1949  |
|          | IL-22        | 1212 ± 15    | 1306 ± 21    | 1259 ± 27    | 1288 ± 8     | 1272 ± 59     | 1265 ± 8      | 1524 ± 36     | 1268 ± 33    | 1326 ± 44      | 1921 ± 489     | 1475 ± 162     | 2562 ± 349     | 3755 ± 587     | 2445 ± 549    |
|          | IL-23        | 402 ± 7      | 445 ± 11     | 487 ± 60     | 495 ± 25     | 461 ± 49      | 462 ± 54      | 600 ± 43      | 396 ± 6      | 416 ± 22       | 452 ± 50       | 443 ± 46       | 417 ± 10       | 529 ± 41       | 485 ± 6       |
|          | IL-27        | 434 ± 32     | 415 ± 14     | 465 ± 52     | 483 ± 43     | 416 ± 41      | 933 ± 169     | 563 ± 21      | 412 ± 16     | 381 ± 25       | 609 ± 133      | 432 ± 101      | 462 ± 7        | 677 ± 121      | 562 ± 4       |
|          | Eotaxin      | 24735 ± 2280 | 26763 ± 819  | 30589 ± 2037 | 27692 ± 3278 | 45642 ± 12530 | 25073 ± 3974  | 58585 ± 5395  | 23601 ± 1341 | 33091 ± 1611   | 40324 ± 2158   | 60503 ± 1547   | 54145 ± 6206   | 66926 ± 4486   | 45570 ± 223   |
|          | GM-CSF       | 175 ± 1      | 186 ± 4      | 180 ± 2      | 221 ± 7      | 195 ± 10      | 186 ± 7       | 308 ± 25      | 187 ± 4      | 204 ± 7        | 227 ± 21       | 209 ± 15       | 944 ± 93       | 732 ± 119      | 730 ± 82.4    |
|          | GRO-alpha    | 521 ± 45     | 832 ± 68     | 680 ± 5      | 1657 ± 156   | 2004 ± 524    | 1490 ± 829    | 8494 ± 1522   | 698 ± 24     | 1610 ± 227     | 2328 ± 561     | 3827 ± 464     | 14376 ± 2495   | 21322 ± 3435   | 14440 ± 8221  |
|          | IFNγ         | 100 ± 16     | 140 ± 2      | 107 ± 22     | 142 ± 21     | 104 ± 14      | 108 ± 20      | 1628 ± 371    | 107 ± 11     | 739 ± 220      | 665 ± 320      | 610 ± 191      | 17974 ± 2671   | 12284 ± 4900   | 12235 ± 2113  |
|          | IP-10        | 2068 ± 159   | 2796 ± 157   | 3023 ± 425   | 5672 ± 103   | 6542 ± 2278   | 4589 ± 1579   | 52371 ± 5730  | 3362 ± 480   | 34024 ± 2376   | 26877 ± 8093   | 41649 ± 9177   | 67907 ± 1850   | 73297 ± 2663   | 58989 ± 1317  |
|          | MCP-1        | 2094 ± 68    | 2215 ± 35    | 2462 ± 201   | 7559 ± 921   | 4237 ± 1025   | 7792 ± 4658   | 25781 ± 3114  | 2706 ± 466   | 5785 ± 507     | 7151 ± 1977    | 11385 ± 2380   | 30825 ± 433    | 35256 ± 4606   | 27976 ± 3876  |
| MCP-3    | 532 ± 53     | 633 ± 20     | 674 ± 77     | 3545 ± 903   | 1912 ± 610   | 1525 ± 692    | 23743 ± 2004  | 651 ± 72      | 4794 ± 948   | 4653 ± 1566    | 8953 ± 1894    | 26425 ± 900    | 29136 ± 3640   | 19868 ± 1072   |               |
| MIP-1α   | 5295 ± 420   | 9156 ± 492   | 9990 ± 635   | 26270 ± 3622 | 19472 ± 4437 | 11227 ± 3056  | 173971 ± 5963 | 44521 ± 12569 | 49741 ± 5171 | 126101 ± 18248 | 134606 ± 11651 | 344442 ± 30385 | 361369 ± 52821 | 382905 ± 50239 |               |
| MIP-1β   | 125 ± 18     | 221 ± 14     | 278 ± 18     | 765 ± 76     | 439 ± 119    | 308 ± 60      | 7215 ± 467    | 479 ± 50      | 1332 ± 162   | 3215 ± 967     | 3182 ± 646     | 11307 ± 1572   | 18020 ± 4707   | 14387 ± 2156   |               |
| MIP-2    | 100 ± 30     | 260 ± 57     | 180 ± 34     | 229 ± 21     | 315 ± 97     | 197 ± 75      | 1306 ± 318    | 285 ± 27      | 848 ± 384    | 1366 ± 467     | 690 ± 67       | 3829 ± 786     | 3807 ± 761     | 4833 ± 1343    |               |
| Rantes   | 8627 ± 827   | 11272 ± 999  | 14751 ± 1141 | 18468 ± 633  | 18620 ± 4351 | 11095 ± 957   | 53629 ± 5647  | 11752 ± 919   | 22292 ± 1548 | 31977 ± 8413   | 61738 ± 10437  | 48424 ± 2923   | 98720 ± 8546   | 87897 ± 45     |               |
| TNFα     | 641 ± 89     | 930 ± 22     | 765 ± 160    | 943 ± 154    | 756 ± 76     | 756 ± 130     | 1759 ± 78     | 721 ± 27      | 710 ± 59     | 1168 ± 340     | 1130 ± 110     | 2324 ± 202     | 2672 ± 403     | 2682 ± 403     |               |
| Serum    | IL-6         | 47 ± 1       | 46 ± 1       | 47 ± 1       | 51 ± 1       | 48 ± 1        | 85 ± 20       | 55 ± 3        | 47 ± 1       | 51 ± 2         | 50 ± 1         | 52 ± 3         | 61 ± 1         | 85 ± 18        | 507 ± 120     |
|          | IFNγ         | 61 ± 4       | 55 ± 4       | 51 ± 7       | 89 ± 8       | 49 ± 4        | 78 ± 8        | 139 ± 45      | 61 ± 14      | 71 ± 9         | 120 ± 25       | 81 ± 13        | 1239 ± 314     | 1644 ± 523     | 2277 ± 560    |
|          | IP-10        | 152 ± 19     | 163 ± 13     | 162 ± 5      | 249 ± 35     | 157 ± 11      | 244 ± 98      | 775 ± 84      | 195 ± 12     | 187 ± 21       | 199 ± 56       | 238 ± 41       | 1580 ± 242     | 1325 ± 63      | 2963 ± 93     |
|          | Rantes       | 18 ± 7       | 32 ± 9       | 26 ± 6       | 32 ± 6       | 33 ± 5        | 9 ± 9         | 57 ± 11       | 25 ± 5       | 13 ± 7         | 37 ± 9         | 41 ± 15        | 66 ± 28        | 108 ± 44       | 189 ± 2       |

**Table S4: Statistical significance of cytokine and chemokines graphed in Figure 2 and Figure S3, determined by one-way ANOVA and Sidak's multiple comparisons test.**

|                 | Groups        | R265 unvac vs R265 vac |               |                | KN99 unvac vs KN99 vac |                |                | R265 vac vs KN99 vac |                |                |
|-----------------|---------------|------------------------|---------------|----------------|------------------------|----------------|----------------|----------------------|----------------|----------------|
|                 | DPI           | 1                      | 3             | 7              | 1                      | 3              | 7              | 1                    | 3              | 7              |
| Lung cytokines  | IL-1B         | >0.9999<br>ns          | 0.9843<br>ns  | 0.9502<br>ns   | 0.0939<br>ns           | <0.0001<br>*** | <0.0001<br>*** | 0.1237<br>ns         | <0.0001<br>*** | <0.0001<br>*** |
|                 | IL-2          | >0.9999<br>ns          | 0.2299<br>ns  | >0.9999<br>ns  | <0.0001<br>***         | 0.9915<br>ns   | >0.9999<br>*** | <0.0001<br>***       | 0.9947<br>ns   | 0.9996<br>ns   |
|                 | IL-4          | >0.9999<br>ns          | >0.9999<br>ns | 0.9999<br>ns   | 0.0002<br>***          | 0.0247<br>*    | >0.9999<br>ns  | 0.0002<br>***        | 0.0205<br>*    | 0.995<br>ns    |
|                 | IL-5          | >0.9999<br>ns          | >0.9999<br>ns | >0.9999<br>ns  | 0.2111<br>ns           | 0.0471<br>*    | 0.76<br>ns     | 0.1914<br>ns         | 0.037<br>*     | 0.9972<br>ns   |
|                 | IL-6          | >0.9999<br>ns          | >0.9999<br>ns | >0.9999<br>ns  | 0.0035<br>**           | 0.5025<br>ns   | 0.2077<br>ns   | 0.0044<br>**         | 0.4911<br>ns   | 0.039<br>*     |
|                 | IL-9          | 0.9867<br>ns           | 0.8837<br>ns  | >0.9999<br>ns  | 0.9989<br>ns           | 0.0155<br>*    | >0.9999<br>ns  | 0.9243<br>ns         | 0.2076<br>ns   | 0.8371<br>ns   |
|                 | IL-10         | 0.2657<br>ns           | >0.9999<br>ns | 0.0498<br>*    | 0.9922<br>ns           | 0.0141<br>*    | 0.4135<br>ns   | >0.9999<br>ns        | 0.0122<br>*    | >0.9999<br>ns  |
|                 | IL-12p70      | 0.9994<br>ns           | 0.9771<br>ns  | 0.9926<br>ns   | 0.0488<br>*            | 0.2904<br>ns   | 0.8934<br>ns   | 0.0277<br>*          | 0.8243<br>ns   | 0.0045<br>**   |
|                 | IL-13         | >0.9999<br>ns          | >0.9999<br>ns | 0.9986<br>ns   | 0.5982<br>ns           | 0.0661<br>ns   | 0.4291<br>ns   | 0.4921<br>ns         | 0.0879<br>ns   | 0.9991<br>ns   |
|                 | IL-17a        | >0.9999<br>ns          | 0.9289<br>ns  | 0.7564<br>ns   | 0.9535<br>ns           | 0.0012<br>**   | <0.0001<br>*** | 0.9839<br>ns         | 0.0082<br>**   | <0.0001<br>*** |
|                 | IL-18         | >0.9999<br>ns          | 0.9999<br>ns  | >0.9999<br>ns  | 0.0001<br>***          | 0.0009<br>***  | 0.8605<br>ns   | <0.0001<br>***       | 0.001<br>**    | 0.0616<br>ns   |
|                 | IL-22         | >0.9999<br>ns          | 0.7753<br>ns  | >0.9999<br>ns  | 0.0357<br>*            | 0.0001<br>***  | 0.381<br>ns    | 0.0484<br>*          | 0.0014<br>**   | 0.3171<br>ns   |
|                 | IL-23         | 0.9997<br>ns           | 0.9993<br>ns  | 0.9739<br>ns   | 0.9902<br>ns           | 0.929<br>ns    | 0.4231<br>ns   | >0.9999<br>ns        | 0.7734<br>ns   | 0.9975<br>ns   |
|                 | IL-27         | >0.9999<br>ns          | 0.9065<br>ns  | 0.9999<br>ns   | >0.9999<br>ns          | 0.3118<br>ns   | >0.9999<br>ns  | 0.9952<br>ns         | 0.9988<br>ns   | 0.9477<br>ns   |
|                 | Eotaxin       | 0.9899<br>ns           | 0.9255<br>ns  | 0.0065<br>**   | 0.9347<br>ns           | 0.0005<br>***  | 0.7127<br>ns   | 0.0837<br>ns         | 0.0155<br>*    | 0.6609<br>ns   |
|                 | GM-CSF        | >0.9999<br>ns          | 0.9987<br>ns  | >0.9999<br>ns  | <0.0001<br>***         | <0.0001<br>*** | <0.0001<br>*** | <0.0001<br>***       | <0.0001<br>*** | <0.0001<br>*** |
|                 | GRO-α         | >0.9999<br>ns          | 0.9998<br>ns  | 0.9962<br>ns   | 0.003<br>**            | <0.0001<br>*** | 0.5295<br>ns   | 0.0022<br>**         | <0.0001<br>*** | 0.0317<br>*    |
|                 | IFNγ          | >0.9999<br>ns          | >0.9999<br>ns | >0.9999<br>ns  | <0.0001<br>***         | 0.0007<br>***  | 0.0032<br>**   | <0.0001<br>***       | 0.0003<br>***  | 0.0011<br>**   |
|                 | IP-10         | 0.0005<br>***          | 0.0234<br>*   | <0.0001<br>*** | <0.0001<br>***         | <0.0001<br>*** | 0.9806<br>ns   | 0.0002<br>***        | <0.0001<br>*** | 0.1793<br>ns   |
|                 | MCP-1         | 0.9498<br>ns           | 0.8794<br>ns  | 0.9255<br>ns   | <0.0001<br>***         | <0.0001<br>*** | 0.9993<br>ns   | <0.0001<br>***       | <0.0001<br>*** | 0.0015<br>**   |
|                 | MCP-3         | 0.5252<br>ns           | 0.7139<br>ns  | 0.2109<br>ns   | <0.0001<br>***         | <0.0001<br>*** | 0.7417<br>ns   | <0.0001<br>***       | <0.0001<br>*** | 0.0027<br>**   |
|                 | MIP-1α        | 0.8772<br>ns           | 0.0286<br>*   | 0.0205<br>*    | <0.0001<br>***         | <0.0001<br>*** | <0.0001<br>*** | <0.0001<br>***       | <0.0001<br>*** | <0.0001<br>*** |
| MIP-1B          | 0.9999<br>ns  | 0.9385<br>ns           | 0.9624<br>ns  | 0.001<br>**    | <0.0001<br>***         | 0.095<br>ns    | 0.0026<br>**   | <0.0001<br>***       | 0.0025<br>**   |                |
| MIP-2           | 0.9869<br>ns  | 0.6921<br>ns           | 0.9978<br>ns  | 0.0002<br>***  | 0.0007<br>***          | 0.0009<br>***  | 0.0017<br>**   | 0.0119<br>*          | 0.0001<br>***  |                |
| RANTES          | 0.8142<br>ns  | 0.4296<br>ns           | 0.0001<br>*** | 0.0086<br>**   | <0.0001<br>***         | 0.0066<br>**   | 0.0261<br>*    | <0.0001<br>***       | 0.0581<br>ns   |                |
| TNFα            | >0.9999<br>ns | 0.9843<br>ns           | 0.9502<br>ns  | 0.0002<br>***  | <0.0001<br>***         | 0.082<br>ns    | 0.0001<br>***  | 0.0003<br>***        | 0.0009<br>***  |                |
| Serum cytokines | IL-6          | >0.9999<br>ns          | >0.9999<br>ns | >0.9999<br>ns  | >0.9999<br>ns          | >0.9999<br>ns  | <0.0001<br>*** | >0.9999<br>ns        | 0.9509<br>ns   | <0.0001<br>*** |
|                 | IFNγ          | >0.9999<br>ns          | >0.9999<br>ns | >0.9999<br>ns  | 0.0068<br>**           | 0.0013<br>**   | <0.0001<br>*** | 0.008<br>**          | 0.0005<br>***  | <0.0001<br>*** |
|                 | IP-10         | >0.9999<br>ns          | >0.9999<br>ns | >0.9999<br>ns  | <0.0001<br>***         | <0.0001<br>*** | <0.0001<br>*** | <0.0001<br>***       | <0.0001<br>*** | <0.0001<br>*** |
|                 | RANTES        | 0.9967<br>ns           | >0.9999<br>ns | >0.9999<br>ns  | 0.8766<br>ns           | 0.0189<br>*    | 0.0012<br>**   | 0.3563<br>ns         | 0.0928<br>ns   | 0.0003<br>***  |

ns not significant at  $P > 0.05$ ; \* significant at  $P \leq 0.05$ ; \*\* significant at  $P \leq 0.01$ ; \*\*\* significant at  $P \leq 0.001$ .

**Table S5: FACS Panel.**

| <b>Marker</b>  | <b>Fluorophore</b> | <b>Manufacturer</b> | <b>Cat#</b> | <b>Staining concentration (µg/mL)</b> |
|----------------|--------------------|---------------------|-------------|---------------------------------------|
| <b>CD45</b>    | AF488              | BioLegend           | 103121      | 2.5                                   |
| <b>CD4</b>     | APC                | BD                  | 553051      | 2.5                                   |
| <b>CD8</b>     | BV510              | BioLegend           | 100751      | 1.25                                  |
| <b>CD19</b>    | BUV661             | BD                  | 612971      | 2.5                                   |
| <b>CD11b</b>   | BUV395             | BD                  | 563553      | 2.5                                   |
| <b>CD11c</b>   | PE-Dazzle594       | BioLegend           | 117347      | 2.5                                   |
| <b>CD103</b>   | BV421              | BD                  | 562771      | 2.5                                   |
| <b>CD24</b>    | APC-Cy7            | BioLegend           | 101849      | 5                                     |
| <b>SiglecF</b> | BV605              | BD                  | 740388      | 2.5                                   |
| <b>Ly6G</b>    | PE                 | BioLegend           | 127607      | 2.5                                   |
| <b>CD3</b>     | AF700              | BioLegend           | 100215      | 10                                    |
| <b>CD64</b>    | BV711              | BioLegend           | 139311      | 10                                    |
| <b>I-A/I-E</b> | Pe-Cy7             | BioLegend           | 107629      | 0.3                                   |

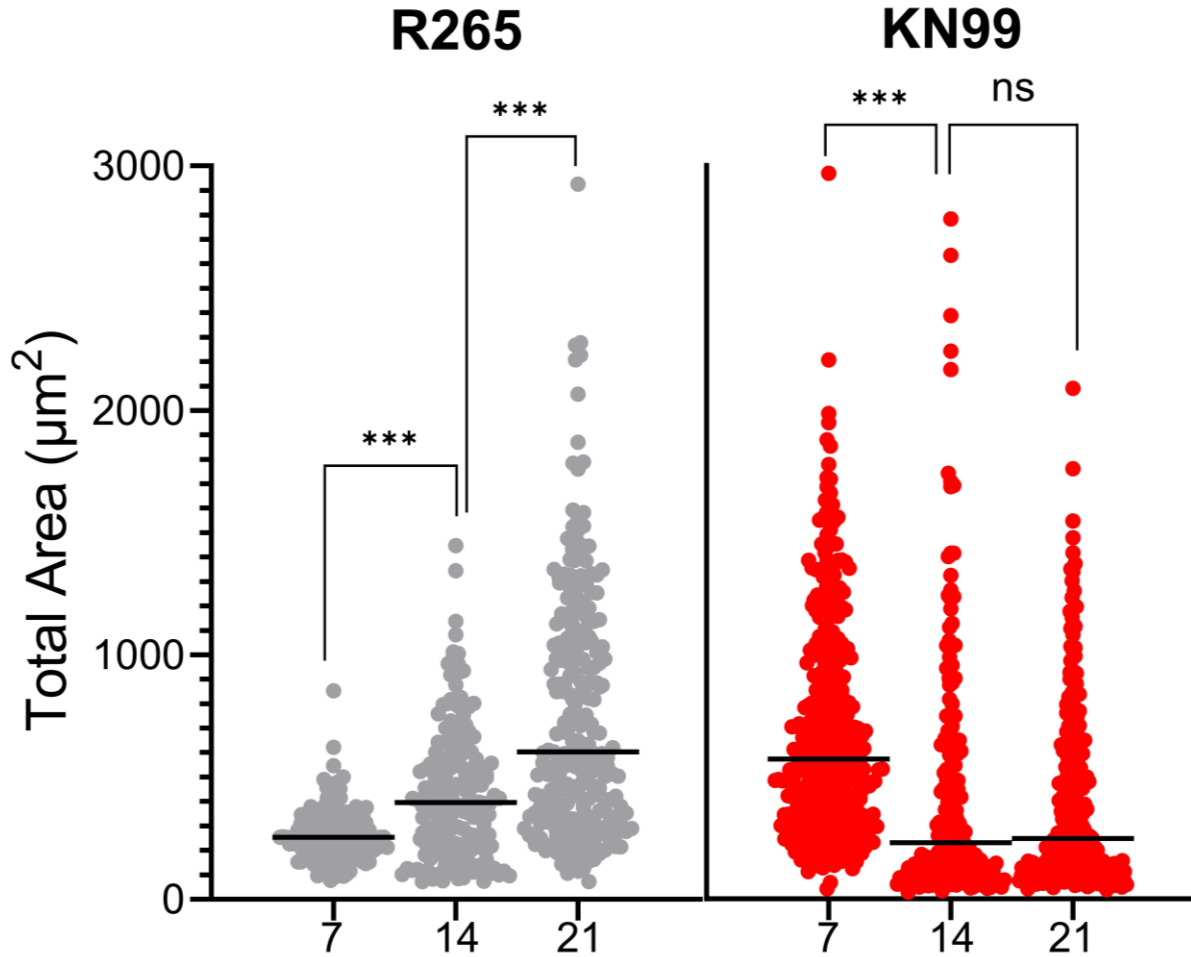

**Figure S1: Total cell + capsule size over time.** The total cell diameter was measured to calculate the total cell area as described in **Figure 1**. Horizontal bars represent the median. Each dot represents a single cell. X-axis represents day post infection. Significance was determined by one-way ANOVA with Sidak's multiple comparisons test. *Not significant (ns) at  $P > 0.05$ ; \*\*\* significant at  $P \leq 0.001$ .*

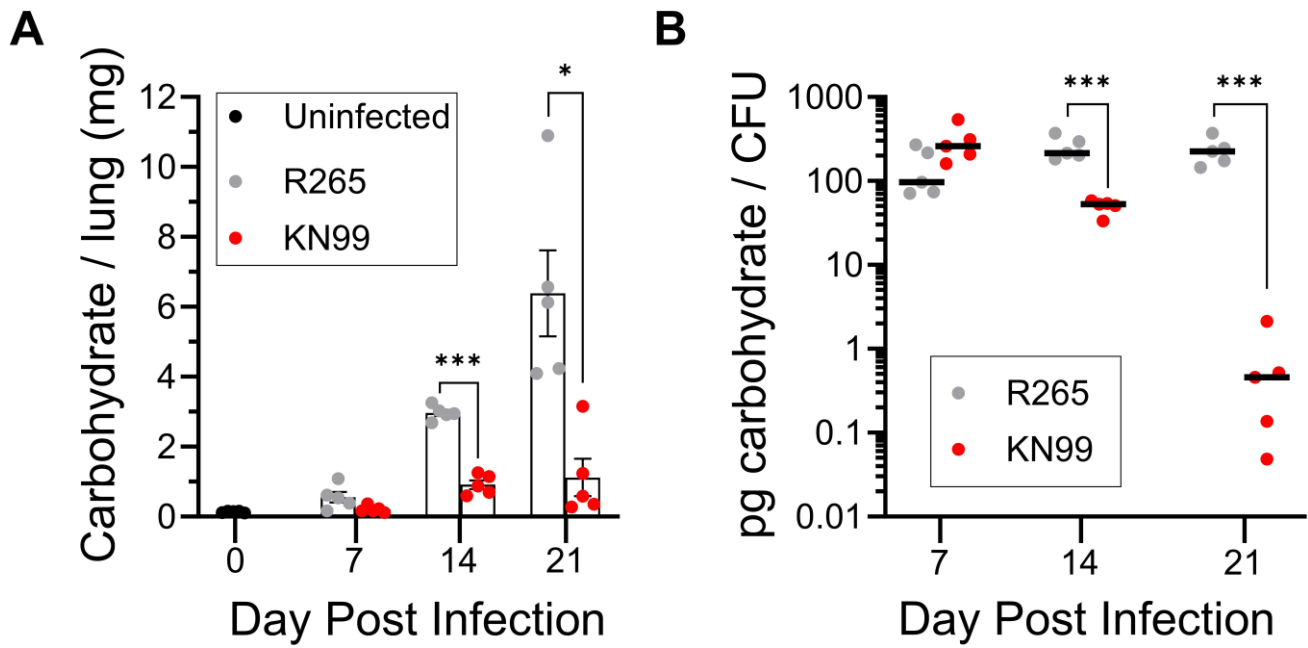

**Figure S2: Carbohydrate content in the supernatants of lung homogenates from infected mice, determined by phenol-sulfuric assay. (A) Total carbohydrate, black dots represent uninfected mice. (B) Carbohydrate normalized to fungal burden in the lungs. Each group had 5 mice. Significance was determined by unpaired, two-tailed T-tests after applying the Bonferroni correction for multiple comparisons. Not significant at  $P > 0.05$  (non-significant comparisons are unmarked); \* significant at  $P \leq 0.05$ ; \*\*\* significant at  $P \leq 0.001$ .**

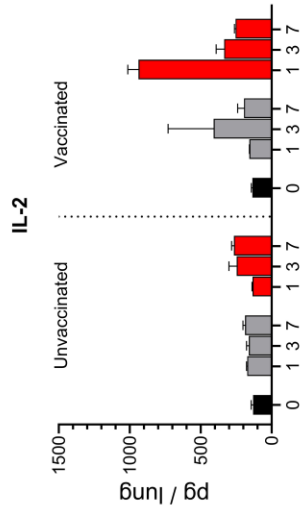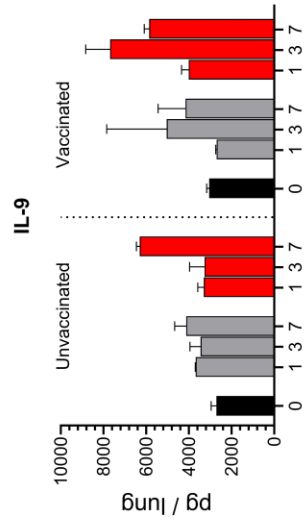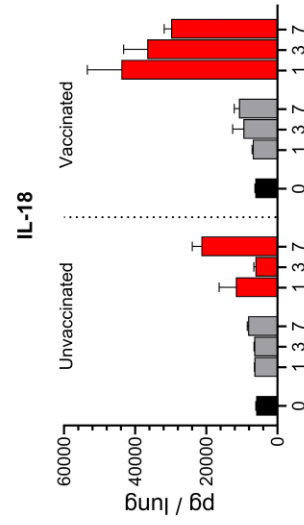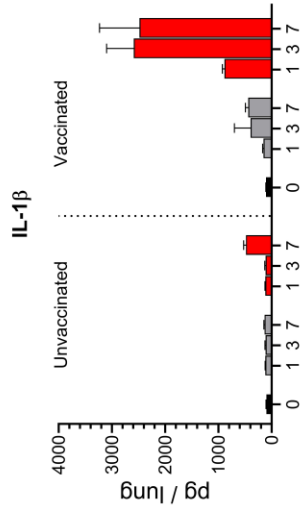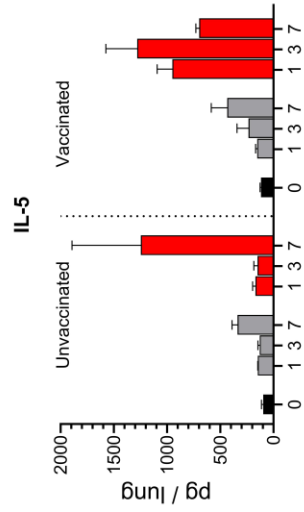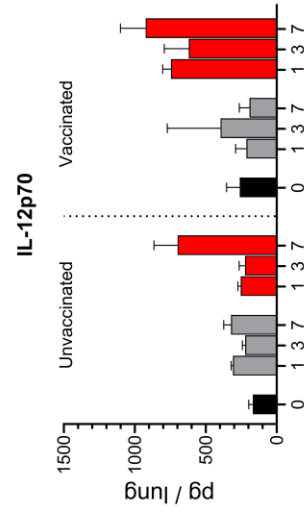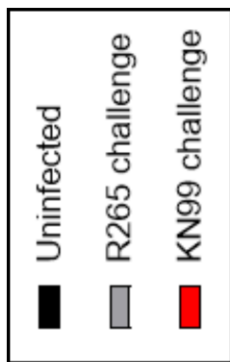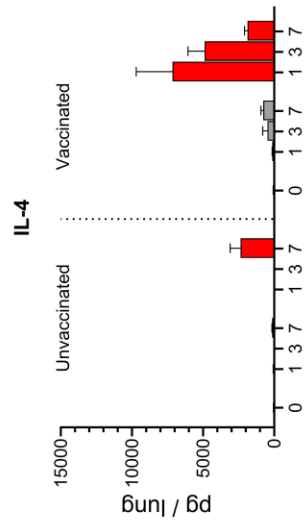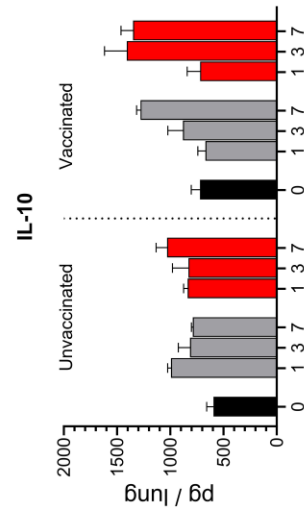



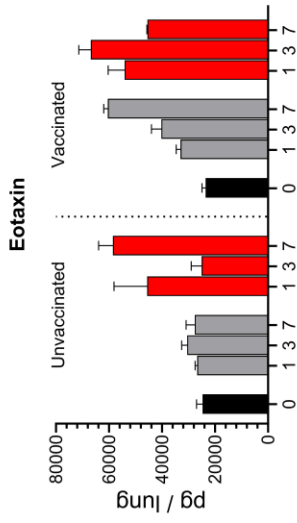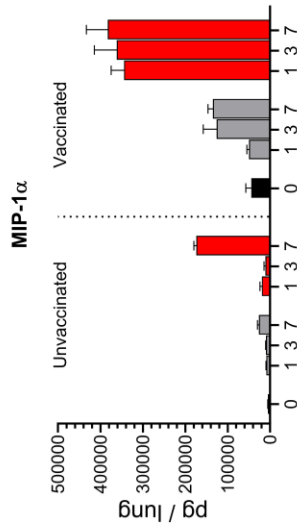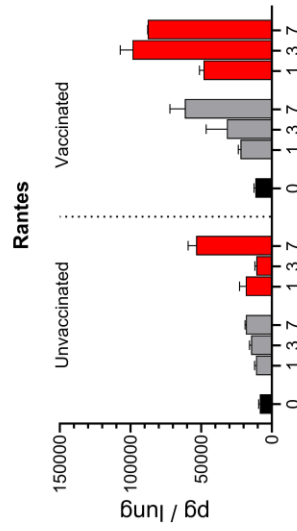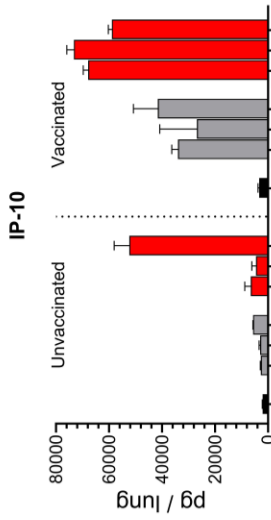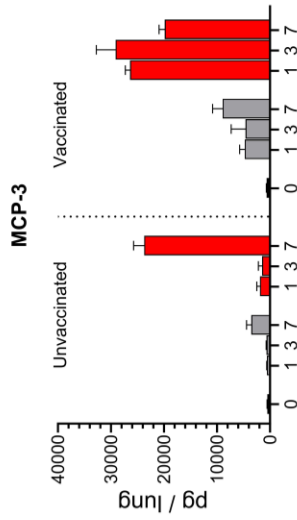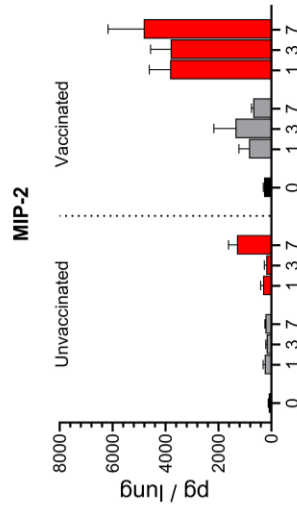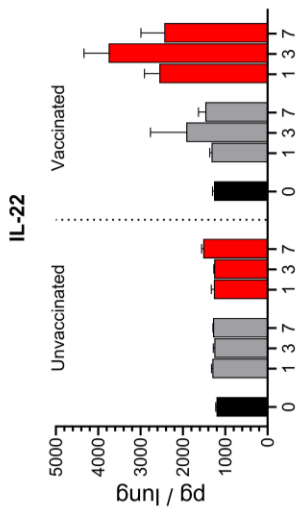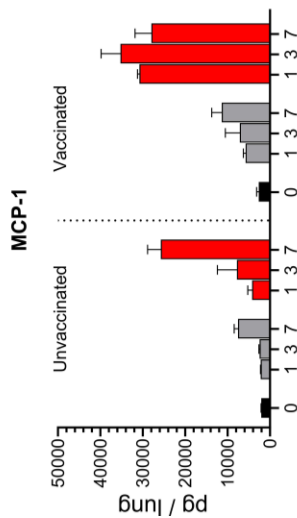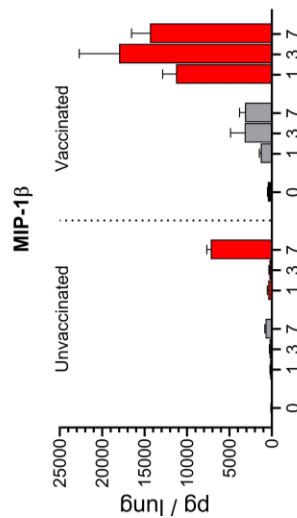

**Figure S3: Additional cytokines and chemokines quantified by Luminex 26-plex.** BALB/c mice were vaccinated and challenged, and at the indicated time points, the mice were euthanized, and their lungs and serum (**Figure S4**) were processed for cytokine multiplex analysis. Data are displayed as in **Figure 2**, with the Y-axis representing either the total cytokine per lung, and the X-axis indicates the day post infection on which samples were collected. Unvaccinated groups are on the left, and vaccinated groups are on the right for uninfected (black), R265-infected (grey), and KN99-infected (red) mice. For each group/timepoint,  $n=3$  mice. Bars represent the mean plus the standard error of the mean. Of the 26 analytes, three had no statistical difference between groups and are not shown (IL-13, IL-23, and IL-27).

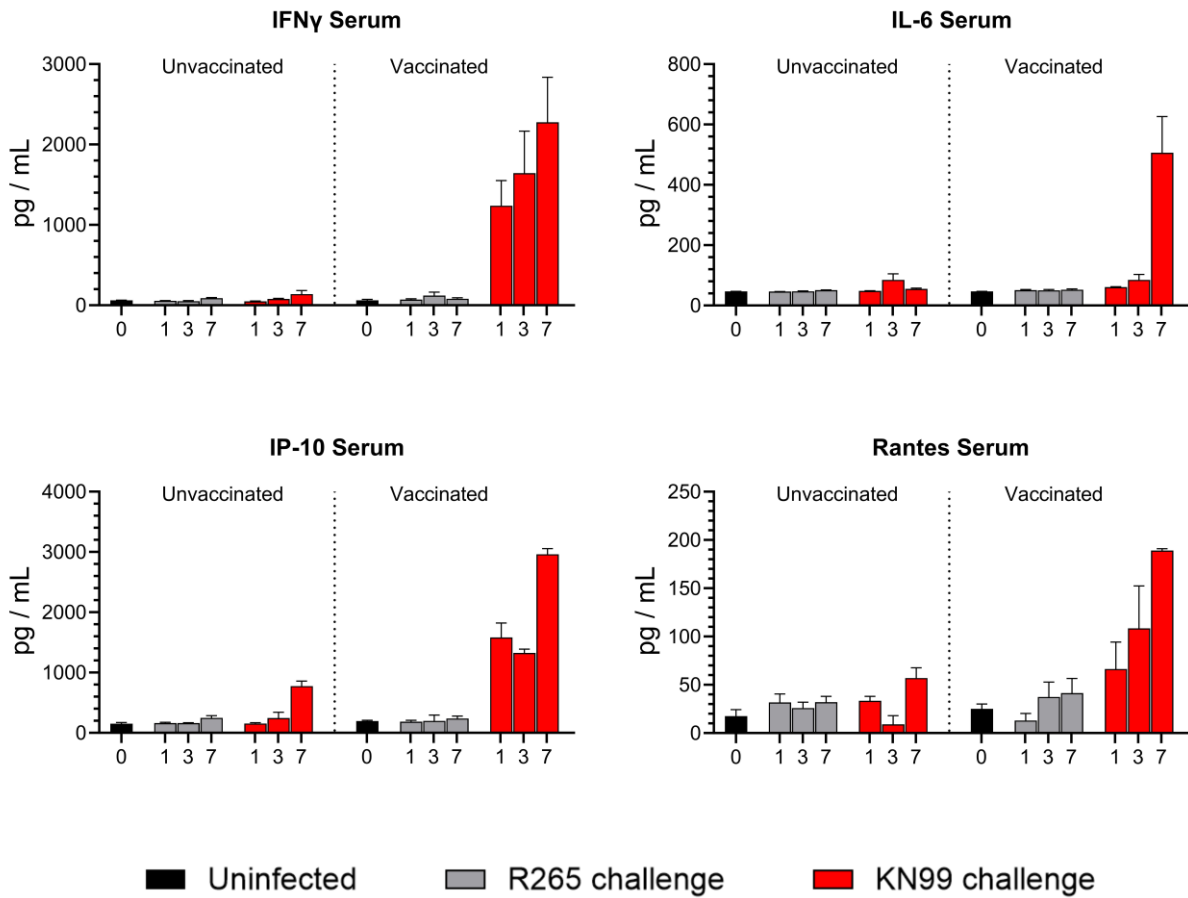

**Figure S4: Serum cytokines quantified by Luminex 26-plex.** BALB/c mice were vaccinated, challenged, and samples were processed as described in **Figure S3**. Data is displayed as in **Figure S3**, but the Y-axis represents cytokine levels in pg per mL of serum.

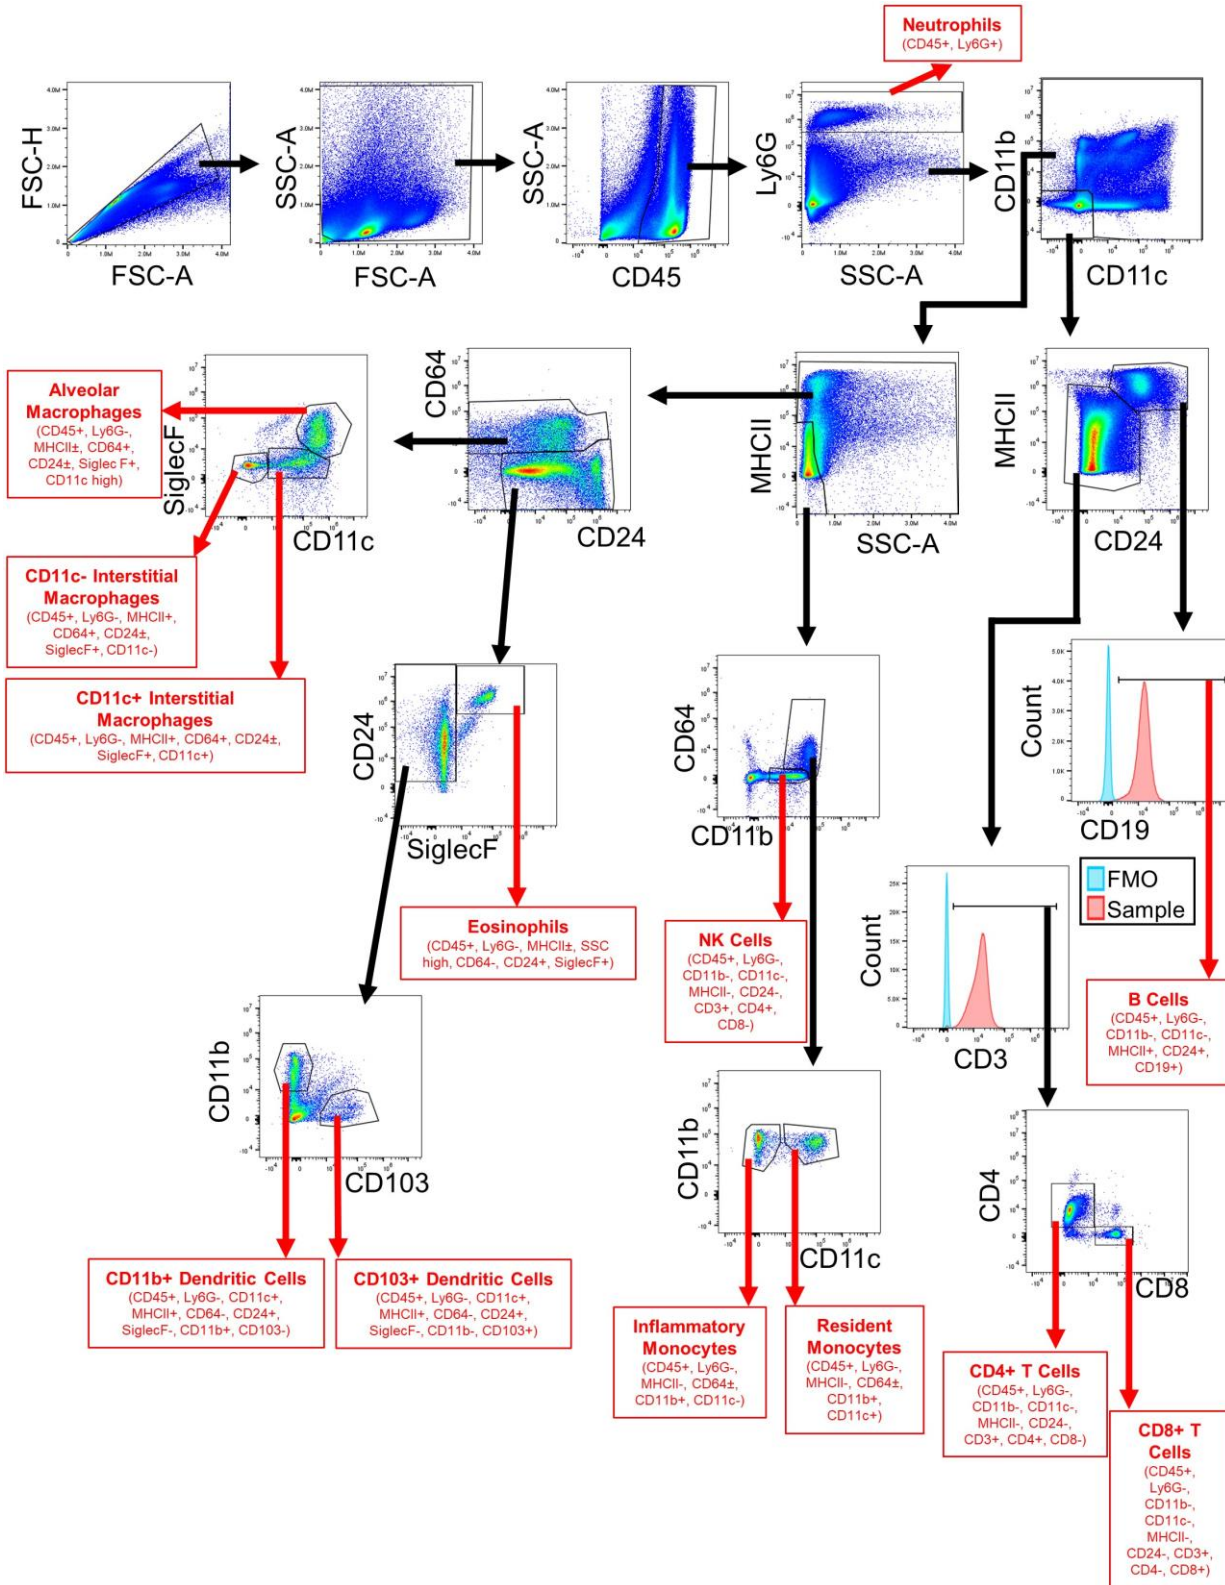

**Figure S5: Gating Scheme for Flow Cytometry.** Unmixed spectral data was analyzed using FlowJo. FMOs were used to determine gates. Gating strategies were adapted from “A Protocol for the Comprehensive Flow Cytometric Analysis of Immune Cells in Normal and Inflamed Murine Non-Lymphoid Tissues,” (1).

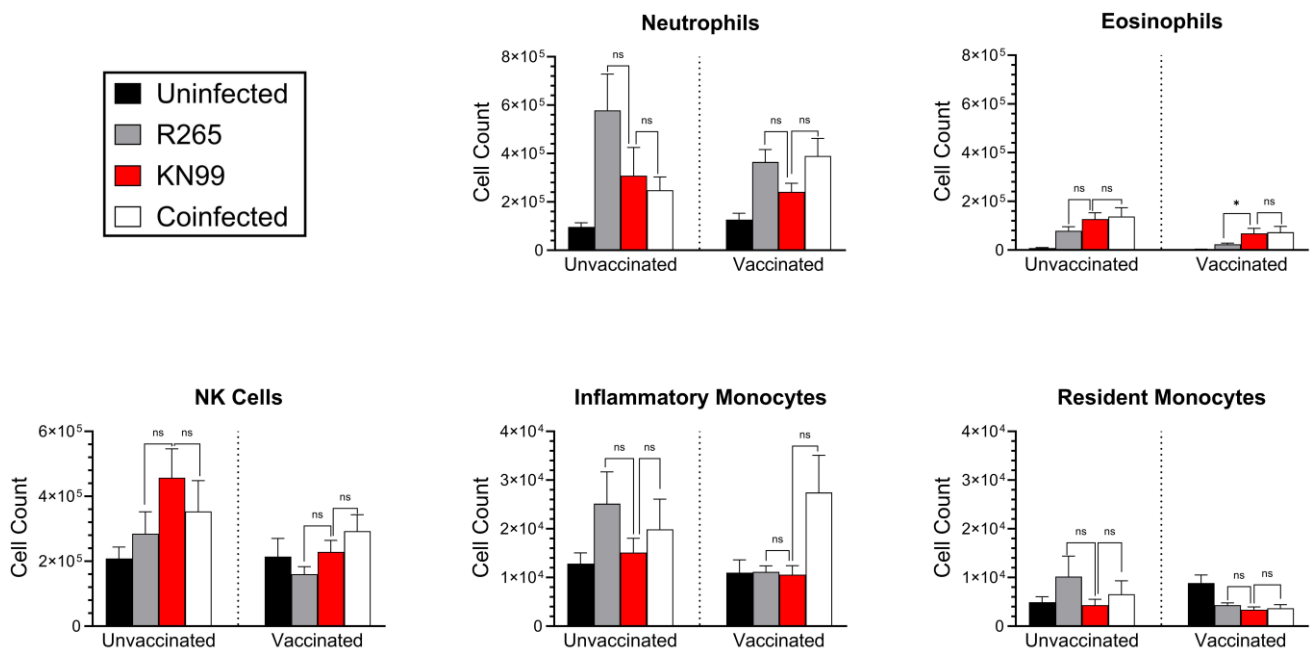

**Figure S6: Additional immune cell phenotyping of lung cells in coinfecting BALB/c mice.**

Samples for flow cytometry were collected and processed as described in **Figure 7**. Unmixed spectral data were analyzed according to the gating strategy outlined in **Figure S5**. Total leukocytes were quantified and then further gated to identify specific cell populations. Bars represent the mean plus the standard error of the mean.  $n=10$  to 14 mice per group. Each group is the cumulative result of 3 separate experiments, with the exception of the vaccinated, unchallenged group being only two separate experiments. Statistical significance was determined by unpaired, two-tailed t tests. *Not significant (ns) at  $P>0.05$ .*

## References

1. Yu YR, O'Koren EG, Hotten DF, Kan MJ, Kopin D, Nelson ER, et al. A protocol for the comprehensive flow cytometric analysis of immune cells in normal and inflamed murine non-lymphoid tissues. *PLoS One*. 2016;11(3):e0150606.
